# Supplementary material
Source: HighWire-hosted journal article supplement (http://www.annfammed.org/highwire/filestream/8948/field_highwire_adjunct_files/0/Hsiao_Supp_Apps_1-3_LC.pdf)
Supplement: Hsiao_Supp_Apps_1-3_LC.pdf [file Hsiao_Supp_Apps_1-3_LC.pdf]

Supplemental materials for:

Hsu W, Wen Y, Chen L, Hsiao F. Comparative Associations Between Measures of Anticholinergic Burden and Adverse Clinical Outcomes. *Ann Fam Med*. 2017;15:561-569.

## Appendix 1. Catastrophic illnesses under Taiwan's National Health Insurance

| Disease category                                                 | ICD-9-CM code                                                                                                              |
|------------------------------------------------------------------|----------------------------------------------------------------------------------------------------------------------------|
| 1. Malignant neoplasm                                            | 140.x-208.xx                                                                                                               |
| 2. Congenital deficiency of clotting factors                     | 286.x                                                                                                                      |
| 3. Hereditary or acquired hemolytic anemias and aplastic anemias | 282.xx-284.x                                                                                                               |
| 4. Systemic autoimmune diseases                                  | 136.1, 443.1, 446.0-446.7, 555.xx, 556.0-556.6, 556.8-556.9, 694.4, 710.0-710.4, 714.0-714.33                              |
| 5. Congenital disorders of metabolism                            | 243, 253.5, 255.2, 270, 271.0, 271.1, 272.1, 272.6, 272.7, 272.9, 275.1, 275.40-275.42, 275.49, 277.2, 277.5, 277.8, 277.9 |
| 6. Severe burn                                                   | 940.x, 941.5x, 948.2x-948.9x                                                                                               |
| 7. Transplantation                                               | V42.0, V42.1, V42.6, V42.7, V42.81-V42.83, 996.81-996.86                                                                   |
| 8. Paralytic syndromes                                           | 045.1x, 343.x, 344.xx                                                                                                      |
| 9. Major trauma                                                  | 959.99                                                                                                                     |
| 10. Long-term mechanical ventilation                             | 518.85                                                                                                                     |
| 11. Decompression sickness and air embolism                      | 993.3                                                                                                                      |
| 12. Air embolism                                                 | 958.0                                                                                                                      |
| 13. Myasthenia gravis                                            | 358.0                                                                                                                      |
| 14. Congenital disorders of immune system                        | 279.00, 279.06, 279.08, 279.1x-279.3, 279.8                                                                                |

This supplemental material has been supplied by the authors and has not been edited by the Annals of Family Medicine.

|     |                                           |                      |
|-----|-------------------------------------------|----------------------|
| 15. | Occupational diseases                     | 500-505              |
| 16. | Multiple sclerosis                        | 340                  |
| 17. | Congenital muscular dystrophy             | 359.0, 359.1         |
| 18. | Congenital anomalies integument           | 757.1, 757.39, 757.9 |
| 19. | Leprosy                                   | 030.x                |
| 20. | Toxic effect of arsenic and its compounds | 985.1                |
| 21. | Motor neuron disease                      | 335.2x               |
| 22. | Creutzfeldt-jakob disease                 | 046.1                |

---

**Appendix 2. Medications listed in Anticholinergic Risk Scale (ARS); WHO ATC code and Defined daily dose (DDD)**

| 1 point                 | ATC code | DD<br>D<br>(mg) | 2 points            | ATC<br>code | DD<br>D<br>(mg) | 3 points                 | ATC code | DD<br>D<br>(mg) |
|-------------------------|----------|-----------------|---------------------|-------------|-----------------|--------------------------|----------|-----------------|
| Carbidopa-levodopa<br>★ | N04BA02  | 600             | Amantadine HCl      | N04BB01     | 200             | Amitriptyline HCl        | N06AA09  | 75              |
| Entacapone              | N04BX02  | 1000            | Baclofen            | M03BX0<br>1 | 50              | Atropine products        | A03BA01  | 1.5             |
| Haloperidol             | N05AD01  | 8               | Cetirizine HCl      | R06AE07     | 10              | Benzatropine mesylate*   | N04AC01  | 2               |
| Methocarbamol           | M03BA03  | 3000            | Cimetidine          | A02BA01     | 800             | Carisoprodol             | M03BA02  | 1400            |
| Metoclopramide HCl      | A03FA01  | 30              | Clozapine           | N05AH0<br>2 | 300             | Chlorpheniramine maleate | R06AB02  | 6               |
| Mirtazapine             | N06AX11  | 30              | Cyclobenzaprine HCl | M03BX0<br>8 | -               | Chlorpromazine HCl       | N05AA01  | 300             |
| Paroxetine HCl          | N06AB05  | 20              | Desipramine*        | N06AA0<br>1 | 100             | Cyproheptadine HCl       | R06AX02  | 12              |
| Pramipexole 2HCl        | N04BC05  | 2.5             | Loperamide          | A07DA0<br>3 | 10              | Dicyclomine HCl          | A03AA07  | 80              |
| Quetiapine fumarate     | N05AH04  | 400             | Loratadine          | R06AX13     | 10              | Diphenhydramine          | R06AA02  | 200             |
| Ranitidine HCl          | A02BA02  | 300             | Nortriptyline*      | N06AA1<br>0 | 75              | Fluphenazine HCl         | N05AB02  | 10              |

This supplemental material has been supplied by the authors and has not been edited by the Annals of Family Medicine.

|                 |         |     |                                      |         |     |                             |         |     |
|-----------------|---------|-----|--------------------------------------|---------|-----|-----------------------------|---------|-----|
| Risperidone     | N05AX08 | 5   | Olanzapine                           | N05AH0  | 10  | Hydroxyzine HCl/<br>pamoate | N05BB01 | 75  |
| Selegiline HCl  | N04BD01 | 5   | Prochlorperazine maleate             | N05AB04 | 100 | Hyoscyamine products        | A03BA03 | 1.2 |
| Trazodone HCl   | N06AX05 | 300 | Pseudoephedrine HCl-triprolidine HCl | R01BA52 | 240 | Imipramine HCl              | N06AA02 | 100 |
| Ziprasidone HCl | N05AE04 | 80  | ★<br>Tolterodine tartrate            | G04BD07 | 4   | Meclizine HCl               | R06AE05 | 50  |
|                 |         |     |                                      |         |     | Oxybutynin Cl               | G04BD04 | 15  |
|                 |         |     |                                      |         |     | Perphenazine                | N05AB03 | 30  |
|                 |         |     |                                      |         |     | Promethazine HCl            | R06AD02 | 25  |
|                 |         |     |                                      |         |     | Thioridazine HCl            | N05AC02 | 300 |
|                 |         |     |                                      |         |     | Thiothixene (tiotixene)     | N05AF04 | 30  |
|                 |         |     |                                      |         |     | Tizanidine HCl              | M03BX02 | 12  |
|                 |         |     |                                      |         |     | Trifluoperazine HCl         | N05AB06 | 20  |

\*Not reimbursed by Taiwan's National Health Insurance    ★Parenteral or combination products

All medications were coded according to the WHO Anatomical Therapeutic Chemical (ATC)/Defined Daily Dose (DDD) classification system<sup>23</sup>.

Defined Daily Dose (DDD): the average maintenance dose per day for a drug used for its main indication in adults

**Appendix 3. Medications listed in Anticholinergic Cognitive Burden Scale (ACB); WHO ATC code and defined daily dose**

| <b>1 point</b>          | <b>ATC code</b> | <b>DDD<br/>(mg)</b> | <b>2 points</b>        | <b>ATC code</b> | <b>DDD<br/>(mg)</b> | <b>3 points</b>  | <b>ATC code</b> | <b>DDD<br/>(mg)</b> |
|-------------------------|-----------------|---------------------|------------------------|-----------------|---------------------|------------------|-----------------|---------------------|
| Alimemazine             | R06AD01         | 30                  | Amantadine             | N04BB01         | 200                 | Amitriptyline    | N06AA09         | 75                  |
| Alverine                | A03AX08         | -                   | Belladonna alkaloids★  | A03BA04         | 1                   | Amoxapine*       | N06AA17         | 150                 |
| Alprazolam              | N05BA12         | 1                   | Carbamazepine          | N03AF01         | 1000                | Atropine         | S01FA01         | 1.5                 |
| Atenolol                | C07AB03         | 75                  | Cyclobenzaprine        | M03BX08         | -                   | Benzatropine*    | N04AC01         | 2                   |
| Brompheniramine maleate | R06AB01         | 24                  | Cyproheptadine         | R06AX02         | 12                  | Brompheniramine  | R06AB01         | 24                  |
| Bupropion HCl           | N06AX12         | 300                 | Empracet*              | -               | -                   | Carbinoxamine    | R06AA08         | 16                  |
| Captopril               | C09AA01         | 50                  | Loxapine               | N05AH01         | 100                 | Chlorpheniramine | R06AB02         | 6                   |
| Chlorthalidone          | C03BA04         | 25                  | Meperidine (Pethidine) | N02AB02         | 400                 | Chlorpromazine   | N05AA01         | 300                 |
| Cimetidine HCl          | A02BA01         | 800                 | Methotrimeprazine      | N05AA02         | 300                 | Clemastine       | R06AA04         | 2                   |
| Ranitidine              | A02BA02         | 300                 | Molindone*             | N05AE02         | 50                  | Clomipramine     | N06AA04         | 100                 |
| Clorazepate             | N05BA05         | 20                  | Oxcarbazepine          | N03AF02         | 1000                | Clozapine        | N05AH02         | 300                 |
| Codeine                 | R05DA04         | 100                 | Pethidine HCl          | N02AB02         | 400                 | Darifenacin*     | G04BD10         | 7.5                 |
| Colchicine              | M04AC01         | 1                   | Pimozide               | N05AG02         | 4                   | Desipramine*     | N06AA01         | 100                 |
| Coumadin                | B01AA03         | 7.5                 |                        |                 |                     | Dicyclomine      | A03AA07         | 80                  |
| Diazepam                | N05BA01         | 10                  |                        |                 |                     | Dimenhydrinate   | -               | -                   |
| Digoxin                 | C01AA05         | 0.25                |                        |                 |                     | Diphenhydramine  | R06AA02         | 200                 |
| Dipyridamole            | B01AC07         | 400                 |                        |                 |                     | Doxepin          | N06AA12         | 100                 |
| Disopyramide phosphate  | C01BA03         | 400                 |                        |                 |                     | Flavoxate        | G04BD02         | 800                 |
| Fentanyl★               | N02AB03         | -                   |                        |                 |                     | Hydroxyzine      | N05BB01         | 75                  |

This supplemental material has been supplied by the authors and has not been edited by the Annals of Family Medicine.

|                        |         |      |                 |         |     |
|------------------------|---------|------|-----------------|---------|-----|
| Furosemide             | C03CA01 | 40   | Hyoscyamine     | A03BA03 | 1.2 |
| Fluvoxamine            | N06AB08 | 100  | Imipramine      | N06AA02 | 100 |
| Haloperidol            | N05AD01 | 8    | Meclizine       | R06AE05 | 50  |
| Hydralazine            | C02DB02 | 100  | Nortriptyline*  | N06AA10 | 75  |
| Hydrocortisone★        | H02AB09 | 30   | Olanzapine      | N05AH03 | 10  |
| Isosorbide mononitrate | C01DA14 | 40   | Orphenadrine    | M03BC01 | 120 |
| Isosorbide dinitrate   | C01DA08 | 60   | Oxybutynin      | G04BD04 | 15  |
| Loperamide             | A07DA03 | 10   | Paroxetine      | N06AB05 | 20  |
| Metoprolol             | C07AB02 | 150  | Perphenazine    | N05AB03 | 30  |
| Morphine               | N02AA01 | 100  | Procyclidine*   | N04AA04 | 25  |
| Nifedipine             | C08CA05 | 30   | Promazine*      | N05AA03 | 300 |
| Prednisone*            | H02AB07 | 10   | Promethazine    | R06AD02 | 25  |
| Quinidine              | C01BA01 | 1200 | Propentheline   | A03AB05 | 60  |
| Risperidone            | N05AX08 | 5    | Pyrilamine★     | R06AC01 | 200 |
| Theophylline           | R03DA04 | 400  | Quetiapine      | N05AH04 | 400 |
| Trazodone              | N06AX05 | 300  | Scopolamine     | A04AD01 | -   |
| Triamterene            | C03DB02 | 100  | Thioridazine    | N05AC02 | 300 |
|                        |         |      | Tolterodine     | G04BD07 | 4   |
|                        |         |      | Trifluoperazine | N05AB06 | 20  |
|                        |         |      | Trihexyphenidyl | N04AA01 | 10  |
|                        |         |      | Trimipramine    | N06AA06 | 150 |

\*Not reimbursed by Taiwan's National Health Insurance    ★Parenteral or combination products

All medications were coded according to the WHO Anatomical Therapeutic Chemical (ATC)/Defined Daily Dose (DDD) classification system<sup>23</sup>.  
Defined Daily Dose (DDD): the average maintenance dose per day for a drug used for its main indication in adults
